# Supplementary material
Source: PubMed Central journal article supplement (PMC4124746)
Supplement: NIHMS413088-supplement-supplement_1.pdf [file NIHMS413088-supplement-supplement_1.pdf]

## SUPPLEMENTAL MATERIAL

### Supplemental Appendix 1.

For the computation of NRI, three categorization approaches were applied to the predicted probabilities of HF within 6 years: (a) “<6%, 6 to 20%, and >20%”, (b) “<3%, 3 to 10%, and >10%”, and (c) category-less;<sup>1</sup> due to uncertainty about cutpoints for risk categories for HF. We compared the change of the predicted probabilities of HF within 6 years based on the risk categories given in (a) and (b) and the category-less approach (c). Based on the estimated risk categories and the predicted probabilities of HF within 6 years, calculated NRI and IDI values, their corresponding standard errors (SE), and the p-values for testing the null hypotheses of having zero NRI and IDI values were computed using Equations 3 through 15 from previous work by Pencina et al.<sup>2</sup>

### Supplemental Appendix 2.

Effects of Interaction between NT-proBNP and other covariates in cox regression for incident HF

| Interaction term                     | P     |                  | HR   | 95% CI     | p      |
|--------------------------------------|-------|------------------|------|------------|--------|
| <b>Log NT-proBNP × age</b>           | 0.19  | <b>NT-proBNP</b> | 6.06 | 1.81-20.26 | 0.003  |
| <b>Log NT-proBNP × sex</b>           | 0.79  | <b>NT-proBNP</b> | 2.63 | 1.92-3.61  | <0.001 |
| <b>Log NT-proBNP × LV mass index</b> | 0.003 | <b>NT-proBNP</b> | 1.83 | 1.32-2.55  | <0.001 |

HR per 1 pg/ml log NT-proBNP increment

### Supplemental Appendix 3.

Cox regression analysis for incident HF in lower NT-proBNP (<112.5 pg/mL, n=4169) population with Model 3 covariates.

| Variables                                | HR   | 95% CI     | P-value |
|------------------------------------------|------|------------|---------|
| <b>Age, per year</b>                     | 1.08 | 1.02-1.14  | 0.013   |
| <b>Male</b>                              | 1.06 | 0.30-3.77  | 0.93    |
| <b>Diabetes</b>                          | 4.52 | 1.65-13.38 | 0.003   |
| <b>Current Smoking</b>                   | 2.21 | 0.67-7.28  | 0.19    |
| <b>Systolic blood pressure, per mmHg</b> | 1.01 | 0.98-1.03  | 0.67    |
| <b>GFR, per mL/min</b>                   | 1.00 | 0.97-1.02  | 0.86    |
| <b>Antihypertensive medication use</b>   | 1.48 | 0.54-4.09  | 0.45    |

---

|                                   |      |           |       |
|-----------------------------------|------|-----------|-------|
| <b>Statin use</b>                 | 0.53 | 0.12-2.38 | 0.53  |
| <b>LDL-cholesterol, per mg/dl</b> | 1.01 | 0.99-1.03 | 0.28  |
| <b>HDL-cholesterol, per mg/dl</b> | 0.98 | 0.94-1.03 | 0.43  |
| <b>LV mass index, per 1SD</b>     | 2.04 | 1.36-3.06 | 0.001 |
| <b>Log NT-proBNP, per 1SD</b>     | 1.46 | 0.77-2.75 | 0.24  |

---

## References

1. Pencina MJ, D'Agostino RB, Vasan RS. Statistical methods for assessment of added usefulness of new biomarkers. *Clin Chem Lab Med.* 2010;48:1703-1711.
2. Pencina MJ, D' Agostino RB, Vasan RS. Evaluating the added predictive ability of a new marker: From area under the ROC curve to reclassification and beyond. *Stat Med.* 2008;27:157-172.
